# Supplementary material for: Prioritizing Approaches to Engage Community Members and Build Trust in Biobanks: A Survey of Attitudes and Opinions of Adults within Outpatient Practices at the University of Maryland
Source: J Pers Med. 2015 Jul 28;5(3):264–79. doi: 10.3390/jpm5030264 (PMC4600147; doi:10.3390/jpm5030264)
Supplement: Supplementary File 1 [file jpm-05-00264-s001.pdf]

# Supplementary Material UMBiobank Survey

## Q1–3

|                                                                                                                         | Yes                   | No                    | Unsure                |
|-------------------------------------------------------------------------------------------------------------------------|-----------------------|-----------------------|-----------------------|
| 1. Do you feel like you understand what you just heard?                                                                 | <input type="radio"/> | <input type="radio"/> | <input type="radio"/> |
| 2. Do you think you would be willing to join the UMBiobank?                                                             | <input type="radio"/> | <input type="radio"/> | <input type="radio"/> |
| 3. Would you want University of Maryland deciding how your blood samples and clinical information are used in research? | <input type="radio"/> | <input type="radio"/> | <input type="radio"/> |

## Q4-11 Please show how comfortable you are with the UMBiobank using your samples and different kinds of information:

|                                                      | Comfortable with the UMBiobank using | Neither comfortable nor uncomfortable with the UMBiobank using | Uncomfortable with the UMBiobank using |
|------------------------------------------------------|--------------------------------------|----------------------------------------------------------------|----------------------------------------|
| 4. Your blood samples                                | <input type="radio"/>                | <input type="radio"/>                                          | <input type="radio"/>                  |
| 5. Your age                                          | <input type="radio"/>                | <input type="radio"/>                                          | <input type="radio"/>                  |
| 6. Your gender                                       | <input type="radio"/>                | <input type="radio"/>                                          | <input type="radio"/>                  |
| 7. Your ethnic group                                 | <input type="radio"/>                | <input type="radio"/>                                          | <input type="radio"/>                  |
| 8. Your previous illnesses and diagnoses             | <input type="radio"/>                | <input type="radio"/>                                          | <input type="radio"/>                  |
| 9. Your test results (e.g., any lab results, x-rays) | <input type="radio"/>                | <input type="radio"/>                                          | <input type="radio"/>                  |
| 10. Your previous treatments (e.g., medications)     | <input type="radio"/>                | <input type="radio"/>                                          | <input type="radio"/>                  |
| 11. Your genetic information or genetic test results | <input type="radio"/>                | <input type="radio"/>                                          | <input type="radio"/>                  |

## Q12-16 Please show how your willingness to join the UMBiobank would change if:

|                                                                                                          | I would be more willing to join the UMBiobank | No change             | I would be less willing to join the UMBiobank |
|----------------------------------------------------------------------------------------------------------|-----------------------------------------------|-----------------------|-----------------------------------------------|
| 12. Members of my community have a role in making decisions about the biobank.                           | <input type="radio"/>                         | <input type="radio"/> | <input type="radio"/>                         |
| 13. There are chances to be updated regularly about the biobank (e.g., press releases, website updates). | <input type="radio"/>                         | <input type="radio"/> | <input type="radio"/>                         |
| 14. There are chances to learn more about the biobank (e.g., educational material).                      | <input type="radio"/>                         | <input type="radio"/> | <input type="radio"/>                         |
| 15. Concerns of my community are put first.                                                              | <input type="radio"/>                         | <input type="radio"/> | <input type="radio"/>                         |
| 16. Members of my community are leading biobank research.                                                | <input type="radio"/>                         | <input type="radio"/> | <input type="radio"/>                         |

**Q17-21 Some people may have concerns about participating in a biobank. Please indicate your level of concern with the following:**

|                                                                                                       | Concerned             | Neither concerned<br>nor unconcerned | Not concerned         |
|-------------------------------------------------------------------------------------------------------|-----------------------|--------------------------------------|-----------------------|
| 17. Researchers having my samples and information.                                                    | <input type="radio"/> | <input type="radio"/>                | <input type="radio"/> |
| 18. Keeping my information private.                                                                   | <input type="radio"/> | <input type="radio"/>                | <input type="radio"/> |
| 19. Information stored in the biobank being used against me.                                          | <input type="radio"/> | <input type="radio"/>                | <input type="radio"/> |
| 20. Feeling like a guinea pig.                                                                        | <input type="radio"/> | <input type="radio"/>                | <input type="radio"/> |
| 21. Information stored in the biobank being used to discriminate against people by race or ethnicity. | <input type="radio"/> | <input type="radio"/>                | <input type="radio"/> |

**Q22-29 Please show if you agree or disagree with the following statements:**

|                                                                                                                                                                                                        | Agree                 | Neither agree<br>nor disagree | Disagree              |
|--------------------------------------------------------------------------------------------------------------------------------------------------------------------------------------------------------|-----------------------|-------------------------------|-----------------------|
| 22. It is important that my blood sample be used in research that could improve my own health.                                                                                                         | <input type="radio"/> | <input type="radio"/>         | <input type="radio"/> |
| 23. It is important that my blood sample be used in research that will not affect my own health, but could improve the health of people I love.                                                        | <input type="radio"/> | <input type="radio"/>         | <input type="radio"/> |
| 24. It is important that my blood sample be used in research that will not affect my own health, or the health of people I love, but could improve the health of others of the same race or ethnicity. | <input type="radio"/> | <input type="radio"/>         | <input type="radio"/> |
| 25. It is important that my blood sample be used in research that will not affect my own health, or the health of people I love, but could improve the health of others in general.                    | <input type="radio"/> | <input type="radio"/>         | <input type="radio"/> |
| 26. Medical researchers care only about what is best for each patient.                                                                                                                                 | <input type="radio"/> | <input type="radio"/>         | <input type="radio"/> |
| 27. Medical researchers tell patients everything they need to know about being in a research study.                                                                                                    | <input type="radio"/> | <input type="radio"/>         | <input type="radio"/> |
| 28. Medical researchers treat people like “guinea pigs.”                                                                                                                                               | <input type="radio"/> | <input type="radio"/>         | <input type="radio"/> |
| 29. I completely trust doctors who do medical research.                                                                                                                                                | <input type="radio"/> | <input type="radio"/>         | <input type="radio"/> |

**Please answer the following questions about your background:**

**Q30 What is your gender?**

- ☐ Male
- ☐ Female
- ☐ Other
- ☐ Prefer not to say

**Q31 What is your ethnic background?**

- ☐ Hispanic or Latino
- ☐ Non-Hispanic
- ☐ Prefer not to say

**Q32 What is your race?**

- ☐ Black or African American
- ☐ White or Caucasian
- ☐ American Indian or Alaska Native
- ☐ Hawaiian or Pacific Islander
- ☐ Asian or Asian American
- ☐ Prefer not to say

**Q33 How old are you?**

- ☐ 18–29 years old
- ☐ 30–44 years old
- ☐ 45–59 years old
- ☐ >60 years old

**Q34 What is your highest level of education?**

- ☐ Less than high school
- ☐ High school graduate or GED
- ☐ Some college
- ☐ Bachelor's degree
- ☐ Graduate or professional degree

**Q35 Do you have children (biological and/or adopted/step/foster)?**

- ☐ Yes
- ☐ No

**Q36 Have you ever donated blood?**

- ☐ Yes
- ☐ No
- ☐ I tried, but was not accepted

**Q37 Have any of your 1st degree relatives (parents, siblings, children) been affected by a major illness?**

- ☐ Yes
- ☐ No
- ☐ Unsure

© 2015 by the authors; licensee MDPI, Basel, Switzerland. This article is an open access article distributed under the terms and conditions of the Creative Commons Attribution license (<http://creativecommons.org/licenses/by/4.0/>).
